# Supplementary material
Source: PubMed Central journal article supplement (PMC4635069)
Supplement: NIHMS720081-supplement-1.pdf [file NIHMS720081-supplement-1.pdf]

## **Inventory of Supplemental Information**

### **Supplementary Figures**

Supplemental Figure 1, related to Figure 1

Supplemental Figure 2, related to Figure 2

Supplemental Figure 3, related to Figure 4

Supplemental Figure 4, related to Figure 5

Supplemental Figure 5, related to Figure 6

Supplemental Figure 6, related to Figure 7

### **Supplemental Experimental Procedures**

### **Supplemental References**
